# Supplementary material for: Ixodes scapularis microbiome correlates with life stage, not the presence of human pathogens, in ticks submitted for diagnostic testing
Source: PeerJ. 2020 Dec 2;8:e10424. doi: 10.7717/peerj.10424 (PMC7718787; doi:10.7717/peerj.10424)
Supplement: Supplemental Information 2 — 15 of the orginal 22 where able to identified the remaining seven were unidentifiable using our search parameters [file peerj-08-10424-s002.xlsx]

## Sheet: Sheet1
Supplemental Table S2: Blastn results of the the ASVs identified as Candidatus carsonella. 15 of the orginal 22 where able to identified the remaining seven were unidentifiable using our search parameters
Sequence	Description	Max Score	Total Score	Query Cover	E-Value	Percent Identity	Accession
1	Ixodes scapularis mitochondrial genes for small rRNA subunit, control region, tRNA-Ile, tRNA-Gln, partial and complete sequence	263	263	0.62	4e-66	0.9809	AB161438.1
1	Ixodes pavlovskyi mitochondrion, complete genome	217	217	0.65	2e-52	0.9024	KJ000060.1
1	Ixodes pavlovskyi 16S ribosomal RNA (rrnL) gene, partial sequence; tRNA-Val (trnV), 12S ribosomal RNA (rrnS), and tRNA-Ile (trnI) genes, complete sequence; and tRNA-Gln (trnQ) gene, partial sequence; mitochondrial	217	217	0.65	2e-52	0.9024	JX392858.1
3	Ixodes scapularis mitochondrial genes for small rRNA subunit, control region, tRNA-Ile, tRNA-Gln, partial and complete sequence	271	271	0.63	8e-69	0.9873	AB161438.1
3	Ixodes pavlovskyi mitochondrion, complete genome	230	230	0.67	2e-56	0.9053	KJ000060.1
3	Ixodes pavlovskyi 16S ribosomal RNA (rrnL) gene, partial sequence; tRNA-Val (trnV), 12S ribosomal RNA (rrnS), and tRNA-Ile (trnI) genes, complete sequence; and tRNA-Gln (trnQ) gene, partial sequence; mitochondrial	230	230	0.67	2e-56	0.9053	JX392858.1
4	Ixodes scapularis mitochondrial genes for small rRNA subunit, control region, tRNA-Ile, tRNA-Gln, partial and complete sequence	263	263	0.62	4e-66	0.9809	AB161438.1
4	Ixodes pavlovskyi mitochondrion, complete genome	217	217	0.65	2e-52	0.9024	KJ000060.1
4	Ixodes pavlovskyi 16S ribosomal RNA (rrnL) gene, partial sequence; tRNA-Val (trnV), 12S ribosomal RNA (rrnS), and tRNA-Ile (trnI) genes, complete sequence; and tRNA-Gln (trnQ) gene, partial sequence; mitochondrial	217	217	0.65	2e-52	0.9024	JX392858.1
7	Ixodes scapularis mitochondrial genes for small rRNA subunit, control region, tRNA-Ile, tRNA-Gln, partial and complete sequence	263	263	0.62	4e-66	0.9809	AB161438.1
7	Ixodes pavlovskyi mitochondrion, complete genome	224	224	0.65	4e-54	0.9091	KJ000060.1
7	Ixodes pavlovskyi 16S ribosomal RNA (rrnL) gene, partial sequence; tRNA-Val (trnV), 12S ribosomal RNA (rrnS), and tRNA-Ile (trnI) genes, complete sequence; and tRNA-Gln (trnQ) gene, partial sequence; mitochondrial	224	224	0.65	4e-54	0.9091	JX392858.1
8	Ixodes pavlovskyi mitochondrion, complete genome	219	219	0.65	4e-53	0.903	KJ000060.1
8	Ixodes pavlovskyi 16S ribosomal RNA (rrnL) gene, partial sequence; tRNA-Val (trnV), 12S ribosomal RNA (rrnS), and tRNA-Ile (trnI) genes, complete sequence; and tRNA-Gln (trnQ) gene, partial sequence; mitochondrial	219	219	0.65	4e-53	0.903	JX392858.1
9	Ixodes pavlovskyi mitochondrion, complete genome	222	222	0.65	1e-53	0.9085	KJ000060.1
9	Ixodes pavlovskyi 16S ribosomal RNA (rrnL) gene, partial sequence; tRNA-Val (trnV), 12S ribosomal RNA (rrnS), and tRNA-Ile (trnI) genes, complete sequence; and tRNA-Gln (trnQ) gene, partial sequence; mitochondrial	222	222	0.65	1e-53	0.9085	JX392858.1
10	Ixodes scapularis mitochondrial genes for small rRNA subunit, control region, tRNA-Ile, tRNA-Gln, partial and complete sequence	265	265	0.62	1e-66	0.9808	AB161438.1
10	Ixodes pavlovskyi mitochondrion, complete genome	223	223	0.64	4e-54	0.9146	KJ000060.1
10	Ixodes pavlovskyi 16S ribosomal RNA (rrnL) gene, partial sequence; tRNA-Val (trnV), 12S ribosomal RNA (rrnS), and tRNA-Ile (trnI) genes, complete sequence; and tRNA-Gln (trnQ) gene, partial sequence; mitochondrial	223	223	0.64	4e-54	0.9146	JX392858.1
12	Ixodes pavlovskyi mitochondrion, complete genome	218	218	0.64	2e-52	0.9085	KJ000060.1
12	Ixodes pavlovskyi 16S ribosomal RNA (rrnL) gene, partial sequence; tRNA-Val (trnV), 12S ribosomal RNA (rrnS), and tRNA-Ile (trnI) genes, complete sequence; and tRNA-Gln (trnQ) gene, partial sequence; mitochondrial	218	218	0.64	2e-52	0.9085	JX392858.1
13	Ixodes scapularis mitochondrial genes for small rRNA subunit, control region, tRNA-Ile, tRNA-Gln, partial and complete sequence	267	267	0.63	3e-67	0.9809	AB161438.1
13	Ixodes pavlovskyi mitochondrion, complete genome	221	221	0.65	1e-53	0.9024	KJ000060.1
13	Ixodes pavlovskyi 16S ribosomal RNA (rrnL) gene, partial sequence; tRNA-Val (trnV), 12S ribosomal RNA (rrnS), and tRNA-Ile (trnI) genes, complete sequence; and tRNA-Gln (trnQ) gene, partial sequence; mitochondrial	221	221	0.65	1e-53	0.9024	JX392858.1
14	Ixodes pavlovskyi mitochondrion, complete genome	214	214	0.63	2e-51	0.9024	KJ000060.1
14	Ixodes pavlovskyi 16S ribosomal RNA (rrnL) gene, partial sequence; tRNA-Val (trnV), 12S ribosomal RNA (rrnS), and tRNA-Ile (trnI) genes, complete sequence; and tRNA-Gln (trnQ) gene, partial sequence; mitochondrial	214	214	0.63	2e-51	0.9024	JX392858.1
15	Ixodes scapularis mitochondrial genes for small rRNA subunit, control region, tRNA-Ile, tRNA-Gln, partial and complete sequence	266	266	0.61	3e-67	0.9808	AB161438.1
15	Ixodes pavlovskyi mitochondrion, complete genome	219	219	0.63	4e-53	0.9085	KJ000060.1
15	Ixodes pavlovskyi 16S ribosomal RNA (rrnL) gene, partial sequence; tRNA-Val (trnV), 12S ribosomal RNA (rrnS), and tRNA-Ile (trnI) genes, complete sequence; and tRNA-Gln (trnQ) gene, partial sequence; mitochondrial	219	219	0.63	4e-53	0.9085	JX392858.1
16	Ixodes scapularis mitochondrial genes for small rRNA subunit, control region, tRNA-Ile, tRNA-Gln, partial and complete sequence	259	259	0.62	5e-65	0.9745	AB161438.1
17	Ixodes scapularis mitochondrial genes for small rRNA subunit, control region, tRNA-Ile, tRNA-Gln, partial and complete sequence	267	267	0.63	3e-67	0.9809	AB161438.1
18	Ixodes scapularis mitochondrial genes for small rRNA subunit, control region, tRNA-Ile, tRNA-Gln, partial and complete sequence	267	267	0.63	3e-67	0.9809	AB161438.1
20	Ixodes scapularis mitochondrial genes for small rRNA subunit, control region, tRNA-Ile, tRNA-Gln, partial and complete sequence	260	260	0.63	5e-65	0.9686	AB161438.1
