# Supplementary material for: Ixodes scapularis microbiome correlates with life stage, not the presence of human pathogens, in ticks submitted for diagnostic testing
Source: PeerJ. 2020 Dec 2;8:e10424. doi: 10.7717/peerj.10424 (PMC7718787; doi:10.7717/peerj.10424)
Supplement: Supplemental Information 3 [file peerj-08-10424-s003.xlsx]

## Sheet: Supplemental table S3_averaged_
Supplemental Table S3: Averaged Phylum realtive abundances of each TBP combintaion
	Proteobacteria	Firmicutes	Spirochaetae	Actinobacteria	Cyanobacteria	Phylum < 1 % abund.	Bacteroidetes	Chlamydiae	Planctomycetes
[Ap]	92.3689	6.70141	0	0.730559	0	0.199086	0	0	0
[Bb,Ap,Bab]	92.5836	0	6.99224	0	0	0.42414	0	0	0
[Bb,Ap]	96.0543	1.93408	1.22879	0	0	0.431411	0.35143	0	0
[Bb,Bab]	97.546	0	1.12094	0.684683	0	0.648328	0	0	0
[Bb]	77.6567	14.2669	6.50006	0.543458	0	0.663709	0.369141	0	0
[Bab]	98.2186	1.76927	0	0	0	0.0121183	0	0	0
[Bm]	82.3043	1.48146	13.7906	1.77533	0	0.648328	0	0	0
[TBP-]	78.9081	10.8919	7.40305	1.39239	0.359913	0.345371	0.29205	0.222976	0.184198
