# Supplementary material for: Ixodes scapularis microbiome correlates with life stage, not the presence of human pathogens, in ticks submitted for diagnostic testing
Source: PeerJ. 2020 Dec 2;8:e10424. doi: 10.7717/peerj.10424 (PMC7718787; doi:10.7717/peerj.10424)
Supplement: Supplemental Information 7 [file peerj-08-10424-s007.xlsx]

## Sheet: Supplemental table S6_Bb_TBP-_G
Supplemental Table S6: Relative abundance of genera in both adults and nymphs.
	Acinetobacter	Borrelia	Brevibacillus	Genus < 15 % abund.	Klebsiella	Lactobacillus	Lysinibacillus	Phylum_Proteobacteria	Pseudomonas	Rickettsia	Staphylococcus	Stenotrophomonas
[Bb]_adult_171573	0	0	0	0.161415	0	0	0	0	0	0.838585	0	0
[Bb]_adult_171757	0	0	0	0.046413	0	0	0	0	0	0.953587	0	0
[Bb]_adult_172132C	0	0	0	0.0355065	0	0	0.643117	0	0	0	0	0.321377
[Bb]_adult_172312	0	0	0	0.0475036	0	0	0	0	0	0.952496	0	0
[Bb]_adult_181761	0	0	0	0.15269	0	0	0	0	0	0.84731	0	0
[Bb]_adult_181867	0	0	0	0.28587	0	0	0.460252	0	0.253878	0	0	0
[Bb]_adult_18367	0	0	0	0.160446	0	0	0	0	0	0.839554	0	0
[TBP-]_adult_171874	0	0	0	0.01127	0	0	0	0.155599	0	0.833131	0	0
[TBP-]_adult_172067	0	0	0	0.0867668	0	0	0	0.170989	0	0.742244	0	0
[TBP-]_adult_172717	0	0	0	0.0420504	0	0	0	0	0	0.95795	0	0
[TBP-]_adult_172720	0	0	0	0.0277508	0	0	0	0	0	0.972249	0	0
[TBP-]_adult_183226	0	0	0.162143	0.294716	0.543141	0	0	0	0	0	0	0
Adult Average	0	0	1.35119	11.27	4.52618	0	9.19474	2.72156	2.11565	66.1426	0	2.67814
[Bb]_nymph_172950	0	0	0	0.0602278	0	0	0	0.501697	0.150994	0.287082	0	0
[Bb]_nymph_173063	0	0	0	0.305259	0	0	0	0.455526	0	0.239215	0	0
[Bb]_nymph_173305	0	0.546534	0	0.196074	0	0	0	0	0	0.257392	0	0
[Bb]_nymph_182755	0	0	0	0.305138	0	0	0.694862	0	0	0	0	0
[Bb]_nymph_183387	0.636573	0	0	0.363427	0	0	0	0	0	0	0	0
[Bb]_nymph_183590	0	0	0	0.311682	0	0	0	0	0.447891	0.240427	0	0
[TBP-]_nymph_173345	0	0	0	0.159476	0	0	0	0.652569	0.187954	0	0	0
[TBP-]_nymph_183014	0	0	0	0.742123	0	0.257877	0	0	0	0	0	0
[TBP-]_nymph_183129	0	0	0	0.323679	0	0	0	0.162143	0	0	0.514178	0
[TBP-]_nymph_183148	0	0.740305	0	0.0785264	0	0	0	0.181168	0	0	0	0
[TBP-]_nymph_183184	0	0	0	0.174382	0	0	0	0	0	0.825618	0	0
Nymph Average	5.78703	11.6985	0	27.4545	0	2.34434	6.31693	17.7555	7.15309	16.8158	4.67435	0
